# Supplementary material for: Temporal requirements for ISL1 in sympathetic neuron proliferation, differentiation, and diversification
Source: PubMed Central journal article supplement (PMC5833373; doi:10.1038/s41419-018-0283-9), 2018-02-14
Supplement: 41419_2018_283_MOESM12_ESM.pdf [file 41419_2018_283_MOESM12_ESM.pdf]

**Table 5 Homer Known Motif Enrichment Results(ISL1 ChIP-seq peak)**

| Rank | Motif | Name                                                        | P-value | logP-value | q-value (Benjamini) | # Target Sequences with Motif | %of Targets Sequences with Motif | Background Sequences with Motif | % of Background Sequences with Motif |
|------|-------|-------------------------------------------------------------|---------|------------|---------------------|-------------------------------|----------------------------------|---------------------------------|--------------------------------------|
| 1    |       | Phox2a(Homeobox)/Neuron-Phox2a-ChIP-Seq(GSE31456)/Homer     | 1e-60   | -1.386e+02 | 0.0000              | 450.0                         | 17.78%                           | 3636.6                          | 7.72%                                |
| 2    |       | Isl1(Homeobox)/Neuron-Isl1-ChIP-Seq(GSE31456)/Homer         | 1e-48   | -1.112e+02 | 0.0000              | 928.0                         | 36.67%                           | 11126.5                         | 23.62%                               |
| 3    |       | Nkx6.1(Homeobox)/Islet-Nkx6.1-ChIP-Seq(GSE40975)/Homer      | 1e-33   | -7.805e+01 | 0.0000              | 1340.0                        | 52.94%                           | 19249.0                         | 40.87%                               |
| 4    |       | Nanog(Homeobox)/mES-Nanog-ChIP-Seq(GSE11724)/Homer          | 1e-24   | -5.749e+01 | 0.0000              | 1396.0                        | 55.16%                           | 21105.0                         | 44.81%                               |
| 5    |       | Lhx3(Homeobox)/Neuron-Lhx3-ChIP-Seq(GSE31456)/Homer         | 1e-19   | -4.561e+01 | 0.0000              | 880.0                         | 34.77%                           | 12452.7                         | 26.44%                               |
| 6    |       | Nkx2.5(Homeobox)/HL1-Nkx2.5.biotin-ChIP-Seq(GSE21529)/Homer | 1e-16   | -3.889e+01 | 0.0000              | 612.0                         | 24.18%                           | 8237.7                          | 17.49%                               |
| 7    |       | Pdx1(Homeobox)/Islet-Pdx1-ChIP-Seq(SRA008281)/Homer         | 1e-14   | -3.352e+01 | 0.0000              | 498.0                         | 19.68%                           | 6594.3                          | 14.00%                               |
| 8    |       | HOXA9(Homeobox)/HSC-Hoxa9-ChIP-Seq(GSE33509)/Homer          | 1e-13   | -3.207e+01 | 0.0000              | 356.0                         | 14.07%                           | 4401.6                          | 9.34%                                |
| 9    |       | GATA3(Zf)/iTreg-Gata3-ChIP-Seq(GSE20898)/Homer              | 1e-13   | -3.201e+01 | 0.0000              | 658.0                         | 26.00%                           | 9296.4                          | 19.74%                               |
| 10   |       | AP-2alpha(AP2)/Hela-AP2alpha-ChIP-Seq(GSE31477)/Homer       | 1e-13   | -3.093e+01 | 0.0000              | 120.0                         | 4.74%                            | 1043.9                          | 2.22%                                |
| 11   |       | Olig2(bHLH)/Neuron-Olig2-ChIP-Seq(GSE30882)/Homer           | 1e-12   | -2.927e+01 | 0.0000              | 515.0                         | 20.35%                           | 7045.3                          | 14.96%                               |
| 12   |       | Nkx3.1(Homeobox)/LNCaP-Nkx3.1-ChIP-Seq(GSE28264)/Homer      | 1e-11   | -2.591e+01 | 0.0000              | 673.0                         | 26.59%                           | 9853.6                          | 20.92%                               |
| 13   |       | Gata4(Zf)/Heart-Gata4-ChIP-Seq(GSE35151)/Homer              | 1e-11   | -2.549e+01 | 0.0000              | 419.0                         | 16.55%                           | 5643.2                          | 11.98%                               |
| 14   |       | Hoxc9(Homeobox)/Ainv15-Hoxc9-ChIP-Seq(GSE21812)/Homer       | 1e-10   | -2.413e+01 | 0.0000              | 282.0                         | 11.14%                           | 3526.8                          | 7.49%                                |
| 15   |       | AP-2gamma(AP2)/MCF7-TFAP2C-ChIP-Seq(GSE21234)/Homer         | 1e-10   | -2.361e+01 | 0.0000              | 141.0                         | 5.57%                            | 1458.7                          | 3.10%                                |
| 16   |       | EBF(EBF)/proBcell-EBF-ChIP-Seq(GSE21978)/Homer              | 1e-10   | -2.335e+01 | 0.0000              | 50.0                          | 1.98%                            | 319.4                           | 0.68%                                |
| 17   |       | Hoxb4(Homeobox)/ES-Hoxb4-ChIP-Seq(GSE34014)/Homer           | 1e-9    | -2.152e+01 | 0.0000              | 105.0                         | 4.15%                            | 1013.0                          | 2.15%                                |
| 18   |       | Gata1(Zf)/K562-GATA1-ChIP-Seq(GSE18829)/Homer               | 1e-9    | -2.095e+01 | 0.0000              | 238.0                         | 9.40%                            | 2958.2                          | 6.28%                                |
| 19   |       | Unknown(Homeobox)/Limb-p300-ChIP-Seq/Homer                  | 1e-8    | -1.968e+01 | 0.0000              | 321.0                         | 12.68%                           | 4312.5                          | 9.16%                                |
| 20   |       | Nkx2.1(Homeobox)/LungAC-Nkx2.1-ChIP-Seq(GSE43252)/Homer     | 1e-8    | -1.968e+01 | 0.0000              | 700.0                         | 27.66%                           | 10681.6                         | 22.68%                               |
| 21   |       | Pitx1(Homeobox)/Chicken-Pitx1-ChIP-Seq(GSE38910)/Homer      | 1e-8    | -1.870e+01 | 0.0000              | 1338.0                        | 52.86%                           | 22242.0                         | 47.22%                               |
| 22   |       | EBF1(EBF)/Near-E2A-ChIP-Seq(GSE21512)/Homer                 | 1e-8    | -1.850e+01 | 0.0000              | 145.0                         | 5.73%                            | 1640.2                          | 3.48%                                |
| 23   |       | SCL(bHLH)/HPC7-Scl-ChIP-Seq(GSE13511)/Homer                 | 1e-7    | -1.810e+01 | 0.0000              | 915.0                         | 36.15%                           | 14581.0                         | 30.96%                               |
